# Supplementary material for: Mutational landscapes of brain metastases across various histological subtypes of lung cancer
Source: Research Square preprint supplement (doi:10.21203/rs.3.rs-5346460/v1), 2025-03-21
Supplement: Supplementary file 1 [file 92bda25789da53571558cfd9.xlsx]

## Sheet: Arkusz1
Supplementary Table 8. The incidence of genes detected in our cohorts and their frequency reported in the TCGA database in primary lung cancer lesions
	% SCLC-BM (n = 19)	% SCLC primary TCGA (n = 377)			% LUAD-BM (n = 79)	% LUAD primary TCGA (n = 9804)			% LUSC-BM (n = 31)	% LUSC primary TCGA (n = 1393)			% LCLC-BM (n = 13)	% LCLC primary TCGA (n = 51)
TP53	89.4737	79		TP53	68.3544	48.9		TP53	90.3226	81.1		TP53	84.6154	79
H3F3A	47.3684	1.3		H3F3A	59.4937	0.2		H3F3A	48.3871	1		H3F3A	61.5385	14.3
RB1	36.8421	60		KRAS	39.2405	26.7		CDK12	38.7097	2.5		KRAS	38.4615	37
NOTCH4	31.5789	4		PMS2	39.2405	1.1		PMS2	32.2581	1.6		PMS2	30.7692	0
PMS2	26.3158	3		NOTCH4	29.1139	4.5		NOTCH4	29.0323	4.1		CHEK2	23.0769	0
PTEN	15.7895	13.4		APC	12.6582	5.2		GNAS	16.129	3.3		EPHA3	23.0769	17
SETBP1	15.7895	7		PIK3CA	10.1266	5.5		NFE2L2	16.129	15		ATM	15.3846	30
APC	10.5263	4.1		SETD2	10.1266	5.8		APC	12.9032	5		BRCA2	15.3846	8.3
ARID1A	10.5263	3.9		EGFR	6.32911	28.9		CDKN2A	12.9032	16		ERBB4	15.3846	10.5
ARID2	10.5263	2.5		RB1	8.86076	5.2		ARID1A	9.67742	8.2		FGFR3	15.3846	0
ERBB4	10.5263	5.8		STK11	7.59494	14.1		FBXW7	9.67742	6		NOTCH2	15.3846	20.5
MTOR	10.5263	3.1		ERBB4	7.59494	5.2		RB1	9.67742	6.3		NOTCH4	15.3846	18.5
NFE2L2	10.5263	2.1		FBXW7	7.59494	1.7		BRAF	6.45161	3.3		NRAS	15.3846	15
PIK3CA	10.5263	4.4		GNAS	7.59494	1.6		CBL	6.45161	0		POLQ	15.3846	0
B2M	5.26316	2.2		CHEK2	6.32911	1.2		CHEK2	6.45161	2.1		RB1	15.3846	21.2
BRAF	5.26316	1.7		GNAQ	6.32911	0.6		ERBB4	6.45161	8		ROS1	15.3846	7.7
BRCA1	5.26316	4.7		HGF	6.32911	5.8		HGF	6.45161	7.2		SMARCA4	15.3846	24.2
BRCA2	5.26316	6.3		NF1	6.32911	7.8		KRAS	6.45161	3.1		ALK	7.69231	26.3
CHEK2	5.26316	1.5		PDGFRA	6.32911	4.2		NF1	6.45161	10		CDKN2A	7.69231	14.3
EPHA3	5.26316	2.6		TGFBR2	6.32911	1.5		PTEN	6.45161	11		CTNNB1	7.69231	0
ESR1	5.26316	3.5		TSC2	6.32911	2.2		SETBP1	6.45161	4		FGFR2	7.69231	8.3
GATA3	5.26316	3		WT1	6.32911	2		AKT1	3.22581	1		GNAS	7.69231	0
GNAQ	5.26316	1.3		ARID1A	5.06329	6.6		APLNR	3.22581	3		HNF1A	7.69231	16.1
HGF	5.26316	9.3		CDKN2A	5.06329	4.8		ATM	3.22581	5		HRAS	7.69231	7.1
HIST1H3B	5.26316	1		EPHA3	5.06329	7		BRCA2	3.22581	7		JUN	7.69231	11.1
HIST1H3C	5.26316	1		KDR	5.06329	4.4		CACNA1E	3.22581	13		KDR	7.69231	13
HNF1A	5.26316	4.2		KIT	5.06329	2		CCNE1	3.22581	1		MAP3K1	7.69231	11.1
JAK1	5.26316	2.2		PTEN	5.06329	3.1		CIITA	3.22581	3		MTOR	7.69231	8.3
JAK3	5.26316	1.7		ERBB3	3.79747	1.3		COBLL1	3.22581	2		NF1	7.69231	15.7
KDR	5.26316	5.6		FGFR2	3.79747	1.2		CREBBP	3.22581	8		NFE2L2	7.69231	7.1
KMT2A	5.26316	14.9		KMT2A	3.79747	3.5		CTCF	3.22581	1		PIK3CB	7.69231	8.3
KRAS	5.26316	2.5		AKT3	2.53165	1.4		DAXX	3.22581	2		PPP2R1A	7.69231	14.3
MET	5.26316	9		ATM	2.53165	8.2		DNMT3A	3.22581	3		PTEN	7.69231	15.8
MLH1	5.26316	3.6		BAP1	2.53165	1.5		ERBB2	3.22581	2		RAF1	7.69231	0
NF2	5.26316	2.5		BRAF	2.53165	4.7		ERBB3	3.22581	2		STK11	7.69231	33
PDGFRA	5.26316	4.9		CTCF	2.53165	1.3		ESR1	3.22581	4		TAF1B	7.69231	0
POLQ	5.26316	7.2		DNMT3A	2.53165	2		FGFR1	3.22581	1		TERT	7.69231	19
RNF43	5.26316	2.7		ERBB2	2.53165	3.8		HIST1H3B	3.22581	7		TSC2	7.69231	0
ROS1	5.26316	6		FGFR3	2.53165	0.7		JAK2	3.22581	4
SMARCA4	5.26316	4.4		MAP3K1	2.53165	1.9		KDR	3.22581	7
SNAPC5	5.26316	3.6		NFE2L2	2.53165	1.9		KIT	3.22581	4
TGFBR2	5.26316	1		NOTCH2	2.53165	3.2		KMT2A	3.22581	4
TSC1	5.26316	1.6		NOTCH3	2.53165	2.7		MAP2K2	3.22581	1
U2AF1L5	5.26316	3		NRAS	2.53165	1.1		MAPK1	3.22581	1
				NTRK1	2.53165	2.3		MAX	3.22581	0
				POLE	2.53165	3.7		MLH1	3.22581	2
				PPP2R1A	2.53165	1.2		MYB	3.22581	2
				RET	2.53165	2.3		MYC	3.22581	1
				SETBP1	2.53165	3.6		NOTCH2	3.22581	5
				SMARCA4	2.53165	7.9		NOTCH3	3.22581	5
				AKT2	1.26582	0.9		PBRM1	3.22581	3
				ALK	1.26582	3.9		PIK3CA	3.22581	13
				APLNR	1.26582	0.6		POLE	3.22581	5
				ARID2	1.26582	4.5		PTCH1	3.22581	2
				ATR	1.26582	3.5		RET	3.22581	4
				B2M	1.26582	1		STK11	3.22581	2
				BRCA1	1.26582	2.9		TSC2	3.22581	4
				BRCA2	1.26582	3.4		VHL	3.22581	0
				CBL	1.26582	1.5
				CCND3	1.26582	0.4
				CDK12	1.26582	1.5
				CDKN2B	1.26582	0.1
				FGFR1	1.26582	1.4
				FGFR4	1.26582	1.7
				IDH1	1.26582	0.8
				JAK1	1.26582	1.4
				JAK3	1.26582	2.5
				KLF4	1.26582	0.9
				MAX	1.26582	1.5
				MET	1.26582	4.4
				MLH1	1.26582	0.9
				MUTYH	1.26582	1
				MYCN	1.26582	0.9
				PDGFRB	1.26582	2.6
				PIK3R1	1.26582	1.3
				PTPN11	1.26582	1
				RAD21	1.26582	1
				RAF1	1.26582	0.8
				ROS1	1.26582	2.3
				SMARCB1	1.26582	0.7
				SMO	1.26582	2.1
				STAG1	1.26582	0.7
				TERT	1.26582	3.8
				U2AF1L5	1.26582	0
				VHL	1.26582	0.4
