# Supplementary material for: Mutational landscapes of brain metastases across various histological subtypes of lung cancer
Source: Research Square preprint supplement (doi:10.21203/rs.3.rs-5346460/v1), 2025-03-21
Supplement: Supplementary file 3 [file a2979d3e798252d97e2d5af1.xlsx]

## Sheet: Arkusz1
	Supplementary Table 1. The detailed clinical and demographic data summary of the studied group
Sample ID	Gender	Age	Age>60	Primary histopathology	Histological subtype of NSCLC
MN60B	male	80	older	NSCLC	LUAD
MN61B	male	77	older	NSCLC	LUAD
MN63B	female	77	older	NSCLC	LUAD
MN64B	male	67	older	NSCLC	LUAD
MN65B	female	69	older	NSCLC	LUAD
MN66B	male	80	older	NSCLC	LUAD
MN67B	male	82	older	NSCLC	LUAD
MN68B	male	57	younger	NSCLC	LUAD
MN69B	female	86	older	NSCLC	LUAD
MN71B	female	64	older	NSCLC	LUAD
MN72B	male	79	older	NSCLC	LUAD
MN73B	male	74	older	NSCLC	LUAD
MN75B	male	79	older	NSCLC	LUAD
MN76B	male	72	older	NSCLC	LUAD
MN77B	male	60	older	NSCLC	LUAD
MN80B	female	59	younger	NSCLC	LUAD
MN81B	male	81	older	NSCLC	LUAD
MN83B	female	60	older	NSCLC	LUAD
MN84B	male	67	older	NSCLC	LUAD
MN85B	female	54	younger	NSCLC	LUAD
MN88B	female	70	older	NSCLC	LUAD
MN89B	male	78	older	NSCLC	LUAD
MN90B	male	76	older	NSCLC	LUAD
MN91B	male	70	older	NSCLC	LUAD
MN92B	male	75	older	NSCLC	LUAD
MN93B	female	58	younger	NSCLC	LUAD
MN94B	male	65	older	NSCLC	LUAD
MN95B	female	68	older	NSCLC	LUAD
MN97B	male	70	older	NSCLC	LUAD
MN98B	male	54	younger	NSCLC	LUAD
MN99B	male	62	older	NSCLC	LUAD
MN101B	male	63	older	NSCLC	LUAD
MN102B	male	57	younger	NSCLC	LUAD
MN104B	male	82	older	NSCLC	LUAD
MN105B	female	64	older	NSCLC	LUAD
MN106B	female	52	younger	NSCLC	LUAD
MN107B	male	68	older	NSCLC	LUSC
MN108B	male	68	older	NSCLC	LUSC
MN109B	male	72	older	NSCLC	LUSC
MN110B	male	63	older	NSCLC	LUSC
MN111B	male	58	younger	NSCLC	LUSC
MN114B	female	65	older	NSCLC	LUSC
MN116B	female	77	older	NSCLC	LUSC
MN118B	female	63	older	NSCLC	LUSC
MN119B	female	70	older	NSCLC	LUSC
MN120B	male	65	older	NSCLC	LUSC
MN121B	male	65	older	NSCLC	LUSC
MN122B	male	72	older	NSCLC	LUSC
MN123B	male	72	older	NSCLC	LUSC
MN124B	male	74	older	NSCLC	LUSC
MN125B	male	61	older	NSCLC	LUSC
MN126B	male	72	older	NSCLC	LUSC
MN127B	female	54	younger	NSCLC	LUSC
MN128B	male	81	older	NSCLC	LUSC
MN129B	male	77	older	NSCLC	LUSC
MN130B	male	64	older	NSCLC	LUSC
MN156B	male	69	older	NSCLC	LUSC
MN157B	male	52	younger	NSCLC	LUSC
MN159B	male	59	younger	NSCLC	LUSC
MN160B	female	44	younger	NSCLC	LUSC
MN161B	male	62	older	NSCLC	LUAD
MN162B	male	70	older	NSCLC	LUAD
MN163B	male	63	older	NSCLC	LUSC
MN165B	female	55	younger	NSCLC	LUAD
MN166B	male	67	older	NSCLC	LUAD
MN169B	male	51	younger	NSCLC	LUAD
MN171B	female	70	older	NSCLC	LUAD
MN172B	female	69	older	NSCLC	LUAD
MN173B	male	72	older	NSCLC	LUAD
MN174B	male	71	older	NSCLC	LUAD
MN175B	male	69	older	NSCLC	LUAD
MN176B	female	64	older	NSCLC	LUAD
MN177B	female	71	older	NSCLC	LUAD
MN179B	female	71	older	NSCLC	LUAD
MN180B	male	71	older	NSCLC	LUSC
MN181B	male	45	younger	NSCLC	LUAD
MN182B	female	53	younger	NSCLC	LUAD
MN184B	female	52	younger	NSCLC	LUAD
MN185B	male	70	older	NSCLC	LUSC
MN189B	female	64	older	NSCLC	LUSC
MN191B	female	56	younger	NSCLC	LUAD
MN193B	male	51	younger	NSCLC	LUAD
MN194B	male	68	older	NSCLC	LUAD
MN195B	male	55	younger	NSCLC	LUAD
MN196B	male	57	younger	NSCLC	LUAD
MN198B	male	76	older	NSCLC	LUAD
MN199B	male	58	younger	NSCLC	LUSC
MN200B	male	60	older	NSCLC	LUAD
MN203B	female	72	older	NSCLC	LUAD
MN204B	male	78	older	NSCLC	LUAD
MN207B	female	60	older	NSCLC	LUAD
MN208B	female	54	younger	NSCLC	LUAD
MN210B	male	50	older	NSCLC	LUSC
MN212B	male	67	older	NSCLC	LUAD
MN213B	male	67	older	NSCLC	LUSC
MN214B	female	58	younger	NSCLC	LUAD
MN215B	female	61	older	NSCLC	LUAD
MN216B	female	59	younger	NSCLC	LUAD
MN217B	male	54	older	NSCLC	LUAD
MN219B	male	77	older	NSCLC	LUSC
MN221B	female	50	younger	NSCLC	LUAD
MN224B	male	63	older	NSCLC	LUAD
MN225B	male	66	older	NSCLC	LUAD
MN227B	male	66	older	NSCLC	LUAD
MN228B	female	54	younger	NSCLC	LUAD
MN229B	male	65	older	NSCLC	LUAD
MN230B	female	56	younger	NSCLC	LUAD
MN235B	male	60	older	NSCLC	LUAD
MN236B	male	73	older	NSCLC	LUAD
MN237B	male	75	older	NSCLC	LUAD
MN148B	male	62	older	NSCLC	LCLC
MN149B	male	60	older	NSCLC	LCLC
MN150B	male	72	older	NSCLC	LCLC
MN151B	male	67	older	NSCLC	LCLC
MN155B	male	64	older	NSCLC	LCLC
MN178B	male	52	younger	NSCLC	LCLC
MN183B	male	53	younger	NSCLC	LCLC
MN190B	male	41	younger	NSCLC	LCLC
MN192B	male	41	younger	NSCLC	LCLC
MN218B	male	67	older	NSCLC	LCLC
MN223B	male	55	younger	NSCLC	LCLC
MN226B	female	60	older	NSCLC	LCLC
MN234B	male	57	younger	NSCLC	LCLC
MN131B	male	67	older	SCLC
MN132B	male	54	younger	SCLC
MN133B	female	67	older	SCLC
MN134B	female	62	older	SCLC
MN135B	male	58	younger	SCLC
MN136B	male	69	older	SCLC
MN137B	female	75	older	SCLC
MN138B	male	72	older	SCLC
MN139B	male	58	younger	SCLC
MN140B	male	79	older	SCLC
MN141B	female	77	older	SCLC
MN142B	male	60	older	SCLC
MN143B	female	57	younger	SCLC
MN144B	male	65	older	SCLC
MN145B	female	63	older	SCLC
MN146B	male	73	older	SCLC
MN147B	male	69	older	SCLC
MN167B	male	67	older	SCLC
MN202B	male	54	younger	SCLC
