# Supplementary material for: Mutational landscapes of brain metastases across various histological subtypes of lung cancer
Source: Research Square preprint supplement (doi:10.21203/rs.3.rs-5346460/v1), 2025-03-21
Supplement: Supplementary file 4 [file c5a073787098dd3fc58eb6b3.xlsx]

## Sheet: Arkusz1
Supplementary Table 10. The overview of NGS based studies on lung cancer brain metastases
number of samples	samples type	Study
18	NSCLC-BM	Saunus et al. Integrated genomic and transcriptomic analysis of human brain metastases identifies alterations of potential clinical significance. J Pathol. 2015 Nov;237(3):363–78.
12	NSCLC-BM	Liu et al. Whole-exome sequencing identifies somatic mutations associated with lung cancer metastasis to the brain. Ann Transl Med. 2021 Apr;9(8):694
11	LUAD-BM + matched primary lesions	Jiang et al. Mutational Landscape and Evolutionary Pattern of Liver and Brain Metastasis in Lung Adenocarcinoma. J Thorac Oncol. 2021 Feb;16(2):237–49
61	NSCLC-BM + matched primary lesions	Wang et al. Genes associated with increased brain metastasis risk in non-small cell lung cancer: Comprehensive genomic profiling of 61 resected brain metastases versus primary non-small cell lung cancer (Guangdong Association Study of Thoracic Oncology 1036). Cancer. 2019 Oct 15;125(20):3535–44.
81	lung BM + matched primary lesions	Dono et al. Differences in Genomic Alterations Between Brain Metastases and Primary Tumors. Neurosurgery. 2021 Feb 16;88(3):592–602.
73	LUAD-BM	Shih et al. Genomic characterization of human brain metastases identifies drivers of metastatic lung adenocarcinoma. Nat Genet. 2020 Apr;52(4):371–7
51	NSCLC-BM + matched primary lesions	Nicoś et al. Genomic Profiling Identifies Putative Pathogenic Alterations in NSCLC Brain Metastases. JTO Clin Res Rep. 2022 Dec;3(12):100435.
