# Supplementary material for: Mutational landscapes of brain metastases across various histological subtypes of lung cancer
Source: Research Square preprint supplement (doi:10.21203/rs.3.rs-5346460/v1), 2025-03-21
Supplement: Supplementary file 5 [file cd4bebe79b4c3cc312985bba.xlsx]

## Sheet: Arkusz1
Supplementary Table 7. The APOBEC enrichement related to genes in LUAD-BM
Sample Summary
Cohort	Sample Size	Mean	Median
Enriched	12	5.500	5.500
nonEnriched	58	5.379	5.00
Gene	Enriched	nonEnriched	pval	or	ci.up	ci.low	adjPval
PTEN	4	0	0.0005398655	Inf	Inf	3.832202079	0.02429395
EGFR	3	2	0.0324846356	8.8645560	120.095321	0.890292283	0.48726953
NF1	3	2	0.0324846356	8.8645560	120.095321	0.890292283	0.48726953
KRAS	1	24	0.0447514427	0.1316386	1.017888	0.002879362	0.50345373
ARID1A	2	2	0.1334427606	5.3978543	82.439466	0.353918354	1.00000000
SETD2	0	8	0.3348274087	0.0000000	2.851298	0.000000000	1.00000000
TP53	10	41	0.4909156704	2.0541418	21.240349	0.376286430	1.00000000
CDKN2A	1	3	0.5372752605	1.6526897	22.906378	0.029129421	1.00000000
KDR	1	3	0.5372752605	1.6526897	22.906378	0.029129421	1.00000000
PDGFRA	0	5	0.5793411459	0.0000000	5.479953	0.000000000	1.00000000
STK11	0	5	0.5793411459	0.0000000	5.479953	0.000000000	1.00000000
TGFBR2	0	5	0.5793411459	0.0000000	5.479953	0.000000000	1.00000000
WT1	0	5	0.5793411459	0.0000000	5.479953	0.000000000	1.00000000
FBXW7	0	6	0.5806354809	0.0000000	4.231697	0.000000000	1.00000000
RB1	2	5	0.5948327172	2.0927751	15.217352	0.176089191	1.00000000
PIK3CA	2	6	0.6178013840	1.7178231	11.608879	0.149226156	1.00000000
NOTCH4	4	15	0.7229034662	1.4255822	6.322131	0.273871215	1.00000000
H3F3A	8	34	0.7507795396	1.4049937	7.122954	0.329482036	1.00000000
PMS2	6	25	0.7543550700	1.3147101	5.578818	0.310377375	1.00000000
APC	1	7	1.0000000000	0.6658548	6.130459	0.013490627	1.00000000
AKT3	0	2	1.0000000000	0.0000000	26.428042	0.000000000	1.00000000
ATM	0	2	1.0000000000	0.0000000	26.428042	0.000000000	1.00000000
BAP1	0	2	1.0000000000	0.0000000	26.428042	0.000000000	1.00000000
BRAF	0	2	1.0000000000	0.0000000	26.428042	0.000000000	1.00000000
CHEK2	0	4	1.0000000000	0.0000000	7.635364	0.000000000	1.00000000
CTCF	0	2	1.0000000000	0.0000000	26.428042	0.000000000	1.00000000
DNMT3A	0	2	1.0000000000	0.0000000	26.428042	0.000000000	1.00000000
EPHA3	0	4	1.0000000000	0.0000000	7.635364	0.000000000	1.00000000
ERBB3	0	3	1.0000000000	0.0000000	12.163351	0.000000000	1.00000000
ERBB4	1	5	1.0000000000	0.9641293	9.956431	0.018695756	1.00000000
FGFR2	0	3	1.0000000000	0.0000000	12.163351	0.000000000	1.00000000
FGFR3	0	2	1.0000000000	0.0000000	26.428042	0.000000000	1.00000000
GNAQ	1	4	1.0000000000	1.2234757	14.056864	0.022866844	1.00000000
GNAS	1	4	1.0000000000	1.2234757	14.056864	0.022866844	1.00000000
HGF	0	3	1.0000000000	0.0000000	12.163351	0.000000000	1.00000000
KIT	0	3	1.0000000000	0.0000000	12.163351	0.000000000	1.00000000
MAP3K1	0	2	1.0000000000	0.0000000	26.428042	0.000000000	1.00000000
NFE2L2	0	2	1.0000000000	0.0000000	26.428042	0.000000000	1.00000000
NOTCH2	0	2	1.0000000000	0.0000000	26.428042	0.000000000	1.00000000
NOTCH3	0	2	1.0000000000	0.0000000	26.428042	0.000000000	1.00000000
NTRK1	0	2	1.0000000000	0.0000000	26.428042	0.000000000	1.00000000
POLE	0	2	1.0000000000	0.0000000	26.428042	0.000000000	1.00000000
RET	0	2	1.0000000000	0.0000000	26.428042	0.000000000	1.00000000
SETBP1	0	2	1.0000000000	0.0000000	26.428042	0.000000000	1.00000000
TSC2	1	4	1.0000000000	1.2234757	14.056864	0.022866844	1.00000000
