# Supplementary material for: Mutational landscapes of brain metastases across various histological subtypes of lung cancer
Source: Research Square preprint supplement (doi:10.21203/rs.3.rs-5346460/v1), 2025-03-21
Supplement: Supplementary file 7 [file e8954efb7ba66d5bcb106f1e.xlsx]

## Sheet: Arkusz1
Supplementary Table 9. Division of genes depending on their function
Tumor supressors	TP53
	RB1
	CHEK2
	PTEN
	APC
	BRCA1
	BRCA2
	TSC1
	STK11
	CDKN2A
	TSC2
Protooncogene	KRAS
	EGFR
	ERBB2
	ERBB3
	ERBB4
	BRAF
	MET
	KIT
	NRAS
	ROS1
	RAF1
	CBL
	FGFR1
	MYCN
	MYB
	MYC
	RET
	HRAS
	JUN
Chromatin remodelling	H3F3A
	ARID1A
	ARID2
	B2M
	KMT2A
	SMARCA4
	BAP1
	CTCF
	POLE
	RAD21
	STAG1
	CREBBP
	PBRM1
Tyrosine kinase activity	AKT2
	AKT3
	ALK
	MAP2K2
	MAP3K1
	MAPK1
	NTRK1
	PDGFRA
	PDGFRB
	EGFR
	ERBB2
	ERBB3
	ERBB4
	FGFR1
	KIT
	MET
	ROS1
	EPHA3
	FGRR2
	FGFR3
	FGFR4
	JAK1
	JAK2
	JAK3
	KDR
