# Supplementary material for: Mutational landscapes of brain metastases across various histological subtypes of lung cancer
Source: Research Square preprint supplement (doi:10.21203/rs.3.rs-5346460/v1), 2025-03-21
Supplement: Supplementary file 8 [file e8a906664dec7c005bd83130.xlsx]

## Sheet: Arkusz1
Supplementary Table 2. The list of genes covered by SureSelect CD Glasgow Cancer Core Panel
Gene
AKT1
AKT2
AKT3
ALK
AMER1
APC
APLNR
AR
ARAF
ARID1A
ARID1B
ARID2
ASXL1
ATM
ATR
ATRX
AURKA
AXL
B2M
BAP1
BCL2
BLM
BRAF
BRCA1
BRCA2
CBL
CCND1
CCND2
CCND3
CCNE1
CD274
CD58
CDK12
CDK2
CDK4
CDK6
CDKN1A
CDKN1B
CDKN2A
CDKN2B
CHEK2
CIITA
CREBBP
CTCF
CTNNB1
DAXX
DICER1
DNMT3A
EGFR
EP300
EPHA3
ERBB2
ERBB3
ERBB4
ERG
ESR1
ETV6
EZH2
FAS
FBXW7
FGF19
FGFR1
FGFR2
FGFR3
FGFR4
GATA3
GNA11
GNAQ
GNAS
H3F3A
H3F3B
HGF
HIST1H3B
HIST1H3C
HIST2H3C
HLA-A
HLA-B
HLA-C
HNF1A
HRAS
IDH1
IDH2
IGF1R
JAK1
JAK2
JAK3
JUN
KDR
KIT
KLF4
KMT2A
KRAS
MAP2K1
MAP2K2
MAP2K4
MAP3K1
MAPK1
MAX
MCL1
MDM2
MED12
MEN1
MET
MLH1
MSH2
MSH6
MTOR
MUTYH
MYB
MYC
MYCN
NBN
NF1
NF2
NFE2L2
NOTCH1
NOTCH2
NOTCH3
NOTCH4
NPM1
NRAS
NTRK1
PALB2
PBRM1
PDCD1LG2
PDGFRA
PDGFRB
PHF6
PIK3CA
PIK3CB
PIK3R1
PMS2
POLE
POLQ
PPP2R1A
PTCH1
PTEN
PTPN11
RAC1
RAD21
RAD50
RAF1
RB1
RET
RHOA
RNF43
ROS1
RPL5
RUNX1
SETBP1
SETD2
SF3B1
SMAD4
SMARCA4
SMARCB1
SMO
SOCS1
SPOP
SRC
STAG1
STAG2
STAT3
STAT5B
STK11
SYK
TERT
TGFBR2
TP53
TSC1
TSC2
U2AF1
VHL
WT1
YAP1
