# Supplementary material for: Mutational landscapes of brain metastases across various histological subtypes of lung cancer
Source: Research Square preprint supplement (doi:10.21203/rs.3.rs-5346460/v1), 2025-03-21
Supplement: Supplementary file 10 [file fb5c3e360ee57db12a1efbf3.xlsx]

## Sheet: Arkusz1
Supplementary Table 5. The summary of variants classification, variant types, and SNP class across all subtypes of lung cancer BMs.
		SCLC-BM	LCLC-BM	LUSC-BM	LUAD-BM
Variants classification	Missense	62	70	103	316
	Nonsense	13	3	14	31
	In_frame_insertion	10	5	15	26
	In_frame_deletion	2	2	5	13
	Splice_site	9	1	8	11
	Intron	31	18	59	140
Variant types	SNPs	85	75	124	373
	Indels	42	24	79	164
SNP class	T > G	4	0	3	11
	T > A	4	0	5	16
	T > C	10	8	11	15
	C > T	23	29	40	126
	C > G	19	23	41	105
	C > A	25	15	23	100
